# Supplementary material for: Microbial immigration across the Mediterranean via airborne dust
Source: PubMed Central journal article supplement (PMC4635359; doi:10.1038/srep16306), 2015-11-06
Supplement: srep16306-s1.pdf [file srep16306-s1.pdf]

## SUPPORTING INFORMATION

### Microbial immigration across the Mediterranean via airborne dust

Riccardo Rosselli<sup>1</sup>, Maura Fiamma<sup>2</sup>, Massimo Deligios<sup>2</sup>, Gabriella Pintus<sup>3</sup>, Grazia Pellizzaro<sup>3</sup>

Annalisa Canu<sup>3</sup>, Pierpaolo Duce<sup>3</sup>, Andrea Squartini<sup>5\*</sup>, Rosella Muresu<sup>4</sup>, Pietro Cappuccinelli<sup>2</sup>

<sup>1</sup>Department of Biology, University of Padova, Via Ugo Bassi 58/b, 35131 Padova, Italy

<sup>2</sup>Department of Biomedical Sciences-University of Sassari, Italy, <sup>3</sup>Institute of Biometeorology-

National Research Council (IBIMET-CNR), Italy, <sup>4</sup>Institute of Animal Production Systems in

Mediterranean Environments-National Research Council (ISPAAM-CNR),Italy. <sup>5</sup>Department of

Agronomy Animals, Food, Natural Resources and Environment, DAFNAE, University of Padova,

Viale dell'Università 16, 35020 Legnaro (Padova) Italy \*Corresponding author: [squart@unipd.it](mailto:squart@unipd.it)

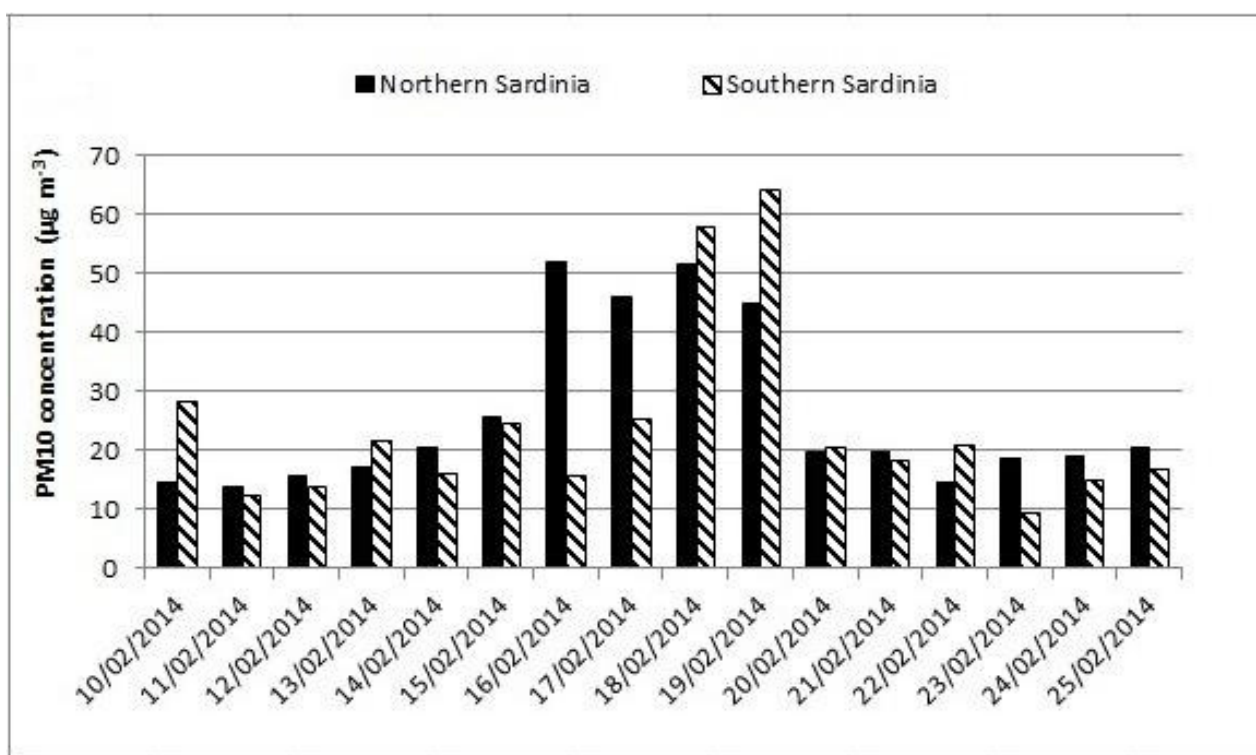

**Figure S1** Daily PM<sub>10</sub> values recorded during the period 10-25 February 2014 at the monitoring stations located in Northern Sardinia (40.72°N, 8.55°E) and Southern Sardinia (39.23°N, 9.00°E).

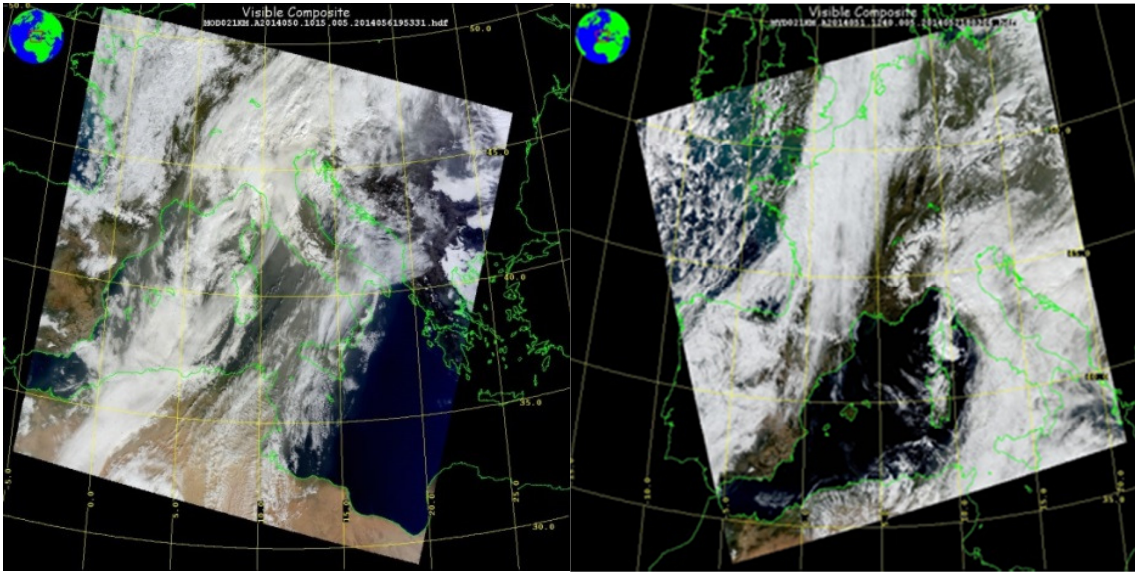

**Figure S2.** Satellite images (MODIS), 19<sup>th</sup> and 20<sup>th</sup> February 2014 (credit to: <http://modis.gsfc.nasa.gov/data/>)
